# THE AMERICAN JOURNAL OF PSYCHIATRY

---

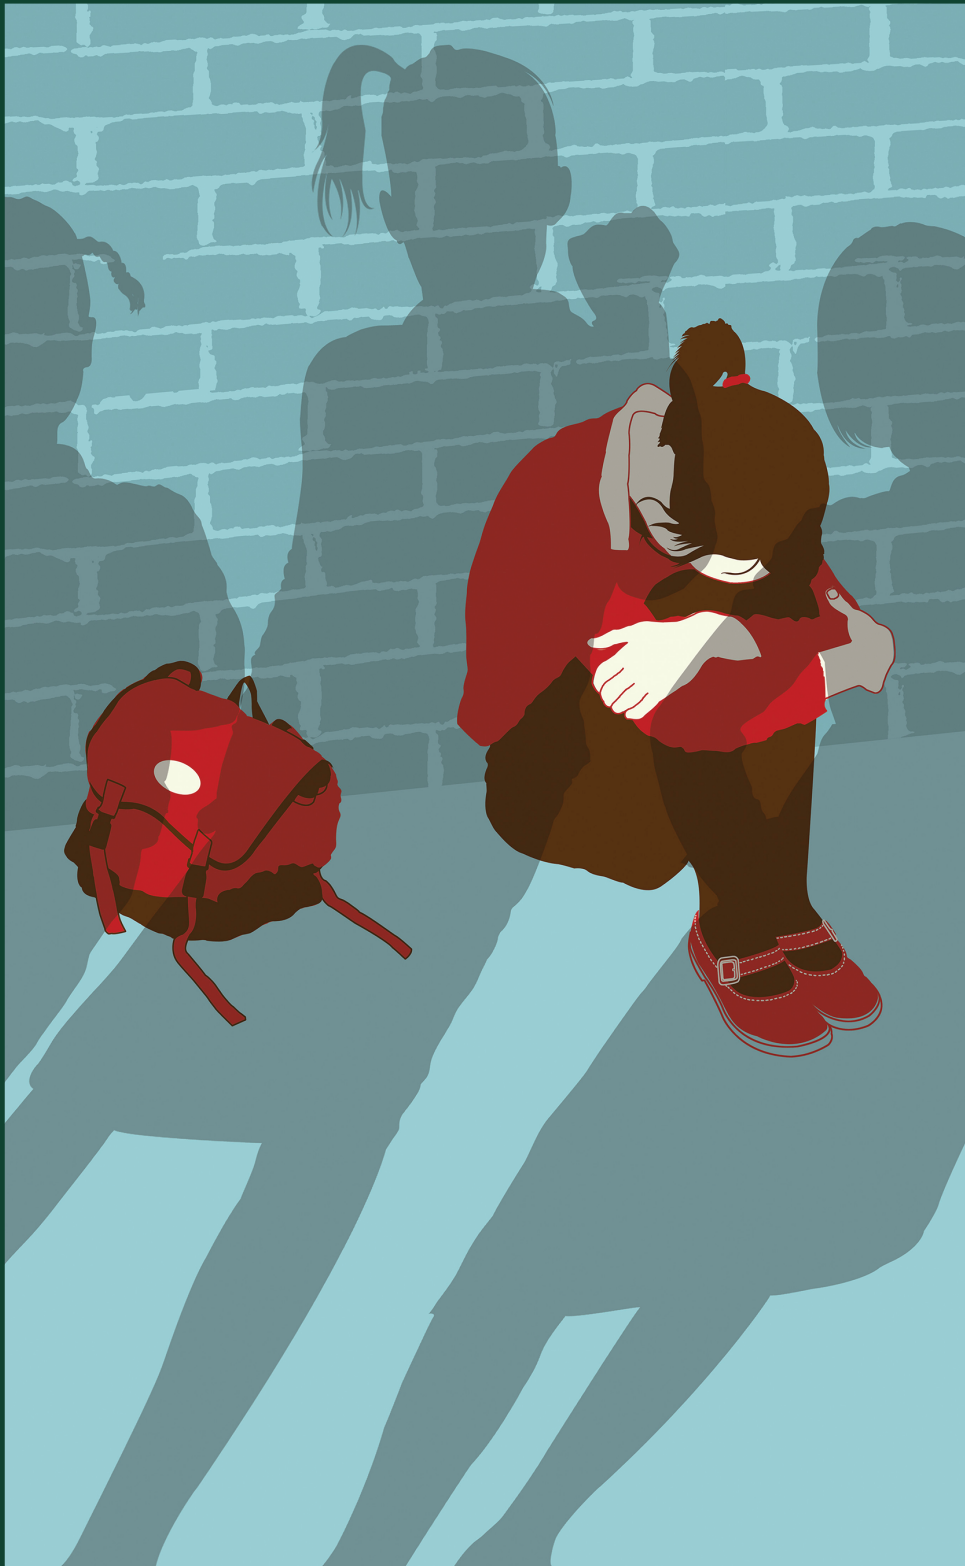

Screening for Violence Risk in  
Military Veterans: Predictive  
Validity of a Brief Clinical Tool

Eric B. Elbogen, Ph.D., et al.

749

Prenatal Expression Patterns  
of Genes Associated With  
Neuropsychiatric Disorders

Rebecca Birnbaum, M.D., et al.

758

◀ Adult Health Outcomes of  
Childhood Bullying Victimization:  
Evidence From a Five-Decade  
Longitudinal British Birth Cohort

Ryu Takizawa, M.D., Ph.D., et al.

777

Pregnancy Outcome Following  
In Utero Exposure to Lithium:  
A Prospective, Comparative,  
Observational Study

Orna Diav-Citrin, M.D., et al.

785

**July 2014**

**Volume 171 • Number 7**

---

Official Journal of the  
AMERICAN PSYCHIATRIC ASSOCIATION

---

[ajp.psychiatryonline.org](http://ajp.psychiatryonline.org)
