# THE AMERICAN JOURNAL OF PSYCHIATRY

## EDITOR-IN-CHIEF

Robert Freedman, M.D.

## DEPUTY EDITORS

David A. Lewis, M.D.

Robert Michels, M.D.

Daniel S. Pine, M.D.

Susan K. Schultz, M.D.

Carol A. Tamminga, M.D.

## EDITORIAL STAFF

**Executive Editor**  
Michael D. Roy

**Senior Editor/Features Writer**  
Jane Weaver, E.L.S.

**Senior Editor**  
John J. Guardiano, Ph.D.

**Production Manager**  
Susan Westrate

**Assistant Editors**  
Katie Duffy  
Angela Moore

**Editorial Support Services  
Manager**  
Nicole Gray

**Editorial Assistant**  
Linda LaCour

**Editorial Assistant/  
Permissions Coordinator**  
Heidi Koch

**Assistants to the Editors**  
Lois Lilienthal  
Laura English  
Rachel Hogg  
Russell A. Scholl

## ASSOCIATE EDITORS

Alan Brown, M.D., M.P.H.

Linda Brzustowicz, M.D.

Tyrone Cannon, Ph.D.

Benjamin G. Druss, M.D., M.P.H.

Graham J. Emslie, M.D.

Daniel C. Javitt, M.D.

Bankole Johnson, M.D.

Ellen Leibenluft, M.D.

Douglas F. Levinson, M.D.

Constantine G. Lyketsos,  
M.D., M.H.S.

Barbara Milrod, M.D.

Jerrold F. Rosenbaum, M.D.

A. John Rush, M.D.

Patricia Suppes, M.D., Ph.D.

Anita Thapar, M.B.B.Ch.,  
F.R.C.Psych., Ph.D., F.Med.Sci.

Mauricio Tohen, M.D.,  
Dr.PH., M.B.A.

Eduard Vieta, M.D., Ph.D.

## EDITOR EMERITA

Nancy C. Andreasen, M.D., Ph.D.

## FORMER EDITORS

Amariah Brigham, M.D.  
1844-1849

T. Romeyn Beck, M.D.  
1849-1854

John P. Gray, M.D.  
1854-1886

G. Alder Blumer, M.D.  
1886-1894

Richard Dewey, M.D.  
1894-1897

Henry M. Hurd, M.D.  
1897-1904

Edward N. Brush, M.D.  
1904-1931

Clarence B. Farrar, M.D.  
1931-1965

Francis J. Braceland, M.D.  
1965-1978

John C. Nemiah, M.D.  
1978-1993

# THE AMERICAN PSYCHIATRIC ASSOCIATION

1000 Wilson Blvd., Suite 1825, Arlington, VA 22209-3901  
(888) 357-7924 (toll-free inside the U.S. and Canada) / (703) 907-7300  
web site: [www.psychiatry.org](http://www.psychiatry.org) • e-mail: [apa@psych.org](mailto:apa@psych.org)

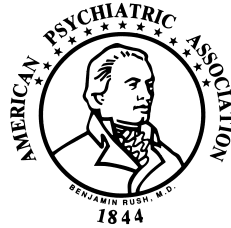

## OFFICERS 2014–2015

|                        |                        |
|------------------------|------------------------|
| <b>President</b>       | Paul Summergrad, M.D.  |
| <b>President-Elect</b> | Renée L. Binder, M.D.  |
| <b>Treasurer</b>       | Frank W. Brown, M.D.   |
| <b>Secretary</b>       | Maria A. Oquendo, M.D. |

## ASSEMBLY

|                      |                       |
|----------------------|-----------------------|
| <b>Speaker</b>       | Jenny L. Boyer, M.D.  |
| <b>Speaker-Elect</b> | Glenn A. Martin, M.D. |
| <b>Recorder</b>      | Daniel J. Anzia       |

## MEDICAL DIRECTOR'S OFFICE

**Medical Director and CEO** Saul Levin, M.D., M.P.A.

## BOARD OF TRUSTEES

|                           |                         |                             |
|---------------------------|-------------------------|-----------------------------|
| Adeniyi O. Adelokun, M.D. | Anita S. Everett, M.D.  | John M. Oldham, M.D.        |
| Jeffrey Akaka, M.D.       | Jeffrey L. Geller, M.D. | Uyen-Khanh Quang-Dang, M.D. |
| R. Scott Benson, M.D.     | Dilip V. Jeste, M.D.    | Gail E. Robinson, M.D.      |
| Lara J. Cox, M.D., M.S.   | Judith F. Kashtan, M.D. | Ravi N. Shah, M.D.          |
| Brian Crowley, M.D.       | Molly K. McVoy, M.D.    | Melinda L. Young, M.D.      |

## PUBLISHER

Rebecca D. Rinehart

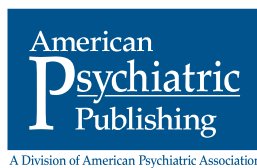

The American Journal of Psychiatry is online at [ajp.psychiatryonline.org](http://ajp.psychiatryonline.org)

THE AMERICAN PSYCHIATRIC ASSOCIATION  
Chairpersons of Councils, Commissions, Committees, and Task Forces

Standing Committees

**Bylaws**

Rebecca W. Brendel, M.D., J.D.

**Elections**

Barry K. Herman, M.D.

**Ethics**

Richard D. Milone, M.D.

**Finance and Budget**

Alan F. Schatzberg, M.D.

*Audit*

Frank W. Brown, M.D.

*Investment Oversight*

David Fassler, M.D.

**Joint Reference**

Renée L. Binder, M.D.

**Membership**

Rahn K. Bailey, M.D.

**Nominating**

Jeffrey A. Lieberman, M.D.

**Tellers**

Hind Benjelloun, M.D.

**Council on Addiction Psychiatry**

Frances R. Levin, M.D.

**Council on Advocacy and Government Relations**

Barry B. Perlman, M.D.

*Advocacy and Litigation Funding*

Jack Drescher, M.D.

**Council on Children, Adolescents, and Their Families**

Louis J. Kraus, M.D.

*Agnes Purcell McGavin Award*

Christopher J. McDougle, M.D.

*Blanche F. Ittleson Research Award*

Matthew W. State, M.D.

*Caucus of Psychiatrists Treating Persons With Intellectual Disabilities*

*Caucus on College Mental Health*

**Council on Communications**

Raymond J. DePaulo, M.D.

**Council on Geriatric Psychiatry**

Robert P. Roca, M.D.

**Council on Healthcare Systems and Financing**

Harsh K. Trivedi, M.D.

*Reimbursement for Psychiatric Care*

Bruce J. Schwartz, M.D.

*RBRVS, Codes and Reimbursement*

Ronald M. Burd, M.D.

**Council on International Psychiatry**

Dilip V. Jeste, M.D.

**Council on Medical Education and Lifelong Learning**

Richard F. Summers, M.D.

*APA Public Psychiatry Fellowship Selection Committee*

Christina V. Mangurian, M.D.

*APA/SAMHSA Minority Fellowship Selection and Advisory*

Altha J. Stewart, M.D.

*Scientific Program*

Philip R. Muskin, M.D.

*Scientific Program Committee of the Institute on Psychiatric Services*

Hunter L. McQuiston, M.D.

*Task Force to Update the Ethics Annotations*

Laura W. Roberts, M.D.

*Vestermark Award Committee*

Jonathan F. Borus, M.D.

**Council on Minority Health and Health Disparities**

Sandra C. Walker, M.D.

**Council on Psychiatry And Law**

Steven K. Hoge, M.D.

*Isaac Ray/Human Rights Award*

Mardoche Sidor, M.D.

*Judicial Action*

Paul S. Appelbaum, M.D.

*Manfred S. Guttmacher Award*

David A. Lowenthal, M.D.

**Council on Psychosomatic Medicine  
(Consultation Liaison Psychiatry)**

David F. Gitlin, M.D.

**Council on Quality Care**

Joel Yager, M.D.

*Mental Health Information Technology*

Steven Roy Daviss, M.D.

*Steering Committee on Practice Guidelines*

Michael J. Vergare, M.D.

**Council on Research**

Dwight L. Evans, M.D.

*Psychiatric Dimensions of Disasters*

Charles R. Marmar, M.D.

*Research Awards*

B. Timothy Walsh, M.D.

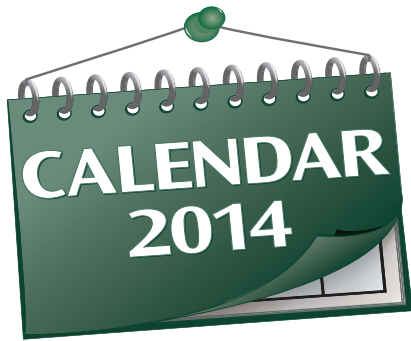

For free listing of your organization's official annual or regional meeting, please send us the following information: sponsor, location, inclusive dates, type and number of continuing education credits (if available), and the name, address, and telephone number of the person or group to contact for more information. In order for an event to appear in our listing, all notices and changes must be received at least 6 months in advance of the meeting and should be addressed to:

**Calendar, American Journal of Psychiatry, 1000 Wilson Boulevard, Suite 1825, Arlington, VA 22209-3901, [swestate@psych.org](mailto:swestate@psych.org) (e-mail).**

Because of space limitations, only listings of meetings of the greatest interest to Journal readers may be included.

## JULY

**July 8–13**, 28th International Congress of Applied Psychology, Palais de Congrès de Paris, France. Contact [exh@icap2014.com](mailto:exh@icap2014.com) (e-mail), [www.icap2014.com](http://www.icap2014.com) (web site).

**July 30–August 1**, 39th Annual University of Colorado Psychiatry Conference, The Gant, Aspen, featuring Glenn Gabbard, M.D., and John Gunderson, M.D., *Good Psychiatric Management*. Contact: Joelyne Jewell, [Joelyne.Jewell@ucdenver.edu](mailto:Joelyne.Jewell@ucdenver.edu) (e-mail), (303) 724 7401 (tel) for information and brochure.

## AUGUST

**August 21–23**, 6th International Conference on Schizophrenia VI (IconS VI), Chennai, India. Organized by Schizophrenia Research Foundation (SCARF) and co-sponsored by WPA, WASP, and IPS. Contact [www.iconsoscarf.org](http://www.iconsoscarf.org) (web site).

## SEPTEMBER

**September 10–12**, The International Marcé Society for Perinatal Mental Health Conference, Swansea, Wales. [www.swansea.ac.uk/marce/](http://www.swansea.ac.uk/marce/) (web site).

## OCTOBER

**October 11–12**, 15th Joint Meeting, American Academy of Psychoanalysis and Dynamic Psychiatry (AAPDP) with Organizzazione di Psicoanalisti Italiani Federazione e Registro (OPIFER), Pisa, Italy. Contact: [info@AAPDP.org](mailto:info@AAPDP.org) (e-mail), [www.AAPDP.org](http://www.AAPDP.org) (web site).

**October 30–November 2**, 66th Institute on Psychiatric Services, San Francisco, CA. [www.psychiatry.org/ips](http://www.psychiatry.org/ips) (web site).

## An essential digital companion to the DSM-5®

*NEW! – Now Spanish language supported!*

### DSM-5® Diagnostic Criteria Mobile App

American Psychiatric Association

The **DSM-5® Diagnostic Criteria Mobile App** is designed to help mental health practitioners, researchers and students fully integrate the new DSM criteria and codes into their practice and study. Users have full offline access to all of the criteria sets as well as online access to supporting videos, commentary and resources. Powerful search and customization tools aid and enhance assessment of symptom presentations in a variety of clinical and administrative settings. It features:

- Access to the complete DSM-5® diagnostic criteria sets on your phone and tablet
- Up to date access to ICD-9-CM and ICD-10-CM codes for clinical and administrative use
- Video commentary from the DSM-5 task force members highlighting changes from DSM-IV to DSM-5
- Robust disorder, acronym, code and symptom search functionality
- Bookmarking allows customization of the criteria sets most commonly referenced

Available for both iOS and Android compatible devices through the iTunes store and Google Play.

As the DSM-5® Diagnostic Criteria Mobile App is only available for sale through the iTunes and Android stores, it is not possible for us to extend our traditional APA Member or APA Resident-Fellow Member discounts on the purchase of this product.

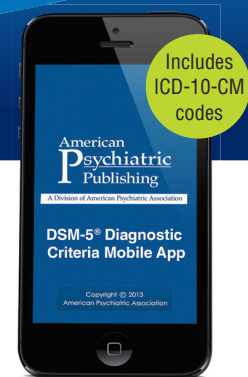



# There's So Much More to AJP Than Meets the Page!

Visit *The American Journal of Psychiatry's* website on PsychiatryOnline for the following features!

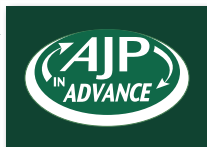

## AJP in Advance

The very latest research advances!

At **AJP in Advance**, you can discover the following before their appearance in print:

### Mindfulness Training in Marines Preparing for Deployment

Marines who had first received Mindfulness-Based Mind Fitness Training, which can affect brain structures integral to the body's response to stress, experienced quicker heart rate and breathing rate recovery, improved sleep quality, and lower levels of neuropeptide Y after stressful combat training than a comparison group without the intervention.

### Unexpected Death of a Loved One and Psychiatric Disorders

Unexpected death of a loved one was associated with heightened vulnerability for virtually all commonly occurring psychiatric disorders, including depression, PTSD, manic episodes, phobias, panic disorder, and substance use disorders in one of the first population-based studies to examine these relations across the lifespan.

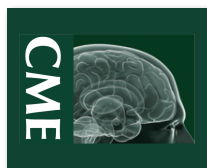

## AJP CME

Three articles in this issue form the basis of a short course with questions that can be answered for up to 1 *AMA PRA Category 1 Credit™* each by visiting <http://psychiatryonline.org/cme.aspx> and clicking on the "American Journal of Psychiatry" tab.

CME credit is issued only online, and a paid subscription to AJP CME course program is required. This month's courses appear on pages 799–802.

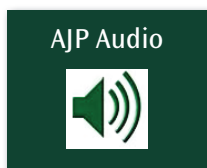

AJP Audio

## Have You Heard?

With AJP Audio you can listen to highlights of this issue. This month, Deputy Editor Susan Schultz discusses the care of pregnant women with attention deficit hyperactivity disorder, the treatment of separation, generalized, and social anxiety disorders in youths, a screening tool for evaluating the risk of violence in military veterans, the continuity of preschool depression, adult health and functioning in people who were bullied as children, and pregnancy outcomes after in utero exposure to lithium.

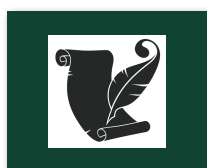

## Revisit the field's rich history!

### 50 years ago this month: Moon Phases, Suicide, And Homicide

The 2497 suicides and 2017 homicides occurring in Texas during the years 1959, 1960, and 1961 were related to the 4 phases of the moon and to the apogee/perigee cycles of the moon during this period. No significant relationships were found.

### 100 years ago this month: The Relations Of Internal Medicine To Psychiatry

"As fellow workers in allied fields of natural science...your way of looking and mine are sufficiently alike to permit, I hope, of a similarity of view consistent with sympathy and with conditional approval. It is desirable that from time to time various internists and various psychiatrists shall give expression to their ideas regarding the mutual relations of their respective subjects, for the fruits of such discussion should grow in value with the number sharing in it."

# The Residents' JOURNAL

## The Residents' JOURNAL

a publication of  
The American Journal of Psychiatry

May 2014

Volume 9

Issue 5

### Inside

- 2 Global Mental Health Research: Pearls, Promises, Perils, and Challenges  
Rajiv Radhakrishnan, M.B.B.S., M.D.
- 5 Challenges of Becoming a Psychiatrist in Haiti: Partners in Health: an Emerging Model to Train Generalist Physicians  
Jennifer Severe, M.D.
- 8 Quality of Life and Mental Health Indicators in Community Members Living Near Open Cast Mines in Northern Colombia  
Dyani A. Loo, M.D.
- 10 Forensic Considerations in Refugee Mental Health  
Hussam Jeebe-Bahloul, M.D.
- 13 A Review of Psychiatry in Tanzania  
Sarah C. Cook, M.B., B.Ch., B.A.O.
- 15 The Transformation of Mental Health Culture in India  
Sunil Jani, M.D., M.P.H.
- 18 Test Your Knowledge
- 19 Author Information and Upcoming Themes

### In This Issue

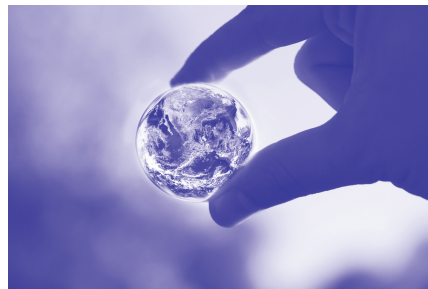

Just as the May issue of the *American Journal of Psychiatry* features commentaries and a debut column on global mental health (see the commentary by Fairburn and Patel on global dissemination of psychological treatments), this issue of the *Residents' Journal* is focused entirely on the topic of global mental health. The issue begins with an article by Rajiv Radhakrishnan, M.B.B.S., M.D., on the pearls, promises, perils, and challenges of global mental health research. Jennifer Severe, M.D., provides enlightening data on an emerging model to train generalist physicians to treat psychiatric disorders in Haiti. Dyani A. Loo, M.D., presents a study on the quality of life and mental health indicators in community members living near open mines in Northern Colombia. Hussam Jeebe-Bahloul, M.D., discusses forensic considerations in refugee mental health. Sarah C. Cook, M.B., B.Ch., B.A.O., provides a review of psychiatry in Tanzania, including history and challenges for care. Last, Sunil Jani, M.D., M.P.H., discusses the transformation of mental health culture in India.

Editor-in-Chief  
Arshya Vahabzadeh, M.D.

Deputy Editor and Guest  
Section Editor  
Misty Richards, M.D., M.S.

Associate Editor  
David Hsu, M.D.

Editors Emeriti  
Sarah B. Johnson, M.D.  
Molly McVay, M.D.  
Joseph M. Cerimele, M.D.  
Sarah M. Fayad, M.D.  
Morrita Seawell, M.D.

Staff Editor  
Angela Moore

### Editor-in-Chief

Misty Richards, M.D., M.S.

### Senior Deputy Editor

Rajiv Radhakrishnan, M.B.B.S., M.D.

### Deputy Editor

Tobias Wasser, M.D.

### Associate Editors

Ijeoma Chukwu, M.D., M.P.H.

Kathleen Mary Patchan, M.D.

### Media Editor

Holly S. Peek, M.D., M.P.H.

*The Residents' Journal* accepts manuscripts authored by medical students, resident physicians, and fellows. To submit your paper, please visit the manuscript submission site at [mc.manuscriptcentral.com/appi-ajp](http://mc.manuscriptcentral.com/appi-ajp) and either create an account or use your existing account. For manuscript type, select "Residents." Then follow the instructions to upload your manuscript. Residents who are interested in participating as Guest Section Editors should e-mail *The Residents' Journal* Editor-in-Chief Misty Richards at [misty.richards@gmail.com](mailto:misty.richards@gmail.com).

*The Residents' Journal* is sent free-of-charge to all psychiatry residents. Anyone interested in being included on the distribution list should contact Angela Moore, *The Residents' Journal* staff editor at [ajp@psych.org](mailto:ajp@psych.org) with "Subscribe to Residents' Journal" in the subject line.

To access the complete Residents' Journal archives, visit [ajp.psychiatryonline.org/residents\\_journal.aspx](http://ajp.psychiatryonline.org/residents_journal.aspx)

## Contents

- A21 Editorial Board  
A23 Highlights of this issue

## Editorials

- 415 **Towards a more nuanced global mental health**  
R. G. White and S. P. Sashidharan

- 417 **On *Regeneration* by Pat Barker – reflection**  
Sharon Singsit-Evans

- 418 **Is the DSM-5 chapter on somatic symptom disorder any better than DSM-IV somatoform disorder?**  
R. Mayou

## Review article

- 420 **Alterations in cortical and extrastriatal subcortical dopamine function in schizophrenia: systematic review and meta-analysis of imaging studies**  
J. Kambeitz, A. Abi-Dargham, S. Kapur and O. D. Howes

## Papers

- 430 **Combined effects of physical illness and comorbid psychiatric disorder on risk of suicide in a national population study**  
P. Qin, K. Hawton, P. B. Mortensen and R. Webb
- 436 **Socioeconomic status and survival among older adults with dementia and depression**  
R. Chen, Z. Hu, L. Wei and K. Wilson
- 441 **Use of services and associated costs for young adults with childhood hyperactivity/conduct problems: 20-year follow-up**  
F. D'Amico, M. Knapp, J. Beecham, S. Sandberg, E. Taylor and K. Sayal
- 448 **Cannabis and stimulant disorders and readmission 2 years after first-episode psychosis**  
G. E. Sara, P. M. Burgess, G. S. Malhi, H. A. Whiteford and W. C. Hall
- 454 **Maintenance cognitive stimulation therapy for dementia: single-blind, multicentre, pragmatic randomised controlled trial**  
M. Orrell, E. Aguirre, A. Spector, Z. Hoare, R. T. Woods, A. Streater, H. Donovan, J. Hoe, M. Knapp, C. Whitaker and I. Russell

- 461 **Dulce et Decorum Est – poem**  
Wilfred Owen

- 462 **Brief psychological intervention after self-harm: randomised controlled trial from Pakistan**  
N. Husain, S. Afsar, J. Ara, H. Fayyaz, R. ur Rahman, B. Tomenson, M. Hamirani, N. Chaudhry, B. Fatima, M. Husain, F. Naeem and I. B. Chaudhry

- 471 **Comparative efficacy of two interventions to discontinue long-term benzodiazepine use: cluster randomised controlled trial in primary care**

C. Vicens, F. Bejarano, E. Sempere, C. Mateu, F. Fiol, I. Socias, E. Aragonès, V. Palop, J. L. Beltran, J. L. Piñol, G. Lera, S. Folch, M. Mengual, J. Basora, M. Esteva, J. Llobera, M. Roca, M. Gili and A. Leiva

- 480 **Efficacy of a triage system to reduce length of hospital stay**  
P. Williams, E. Csipke, D. Rose, L. Koeser, P. McCrone, A. D. Tulloch, G. Salaminios, T. Wykes and T. Craig

## Short report

- 486 **Dopamine transporter occupancy by methylphenidate and impulsivity in adult ADHD**  
C. L. Crunelle, W. van den Brink, G. Dom and J. Booij

## Columns

- 488 Correspondence  
494 Correction

- 494 **Trauma and memory – in 100 words**  
Jonathan Bisson

- 495 Ten books . . . chosen by Gwen Adshead  
498 Contents of *Advances in Psychiatric Treatment*  
499 Book review  
500 Contents of the *American Journal of Psychiatry*  
501 From the Editor's desk

## Cover picture

Jonathan Moore (b. 1975). *Bipolar* (2011)

I was born in the Highlands of Scotland and currently live in Inverness. Since 2003, I have struggled daily with various mental health conditions which feature in much of my artwork. One of my favorite pieces of work, which I named *Bipolar*, was created to express my personal experiences of daily living. Although medication may give a measure of relief and make living manageable at times, I have found this not to be consistent. The colourful centre in the picture symbolises relief or balance, but this is a momentary experience from day to day. The surrounding black area depicts the spectrum of mood swings that can be experienced in daily life (i.e. depression and mania). Those who suffer from such afflictions find they can relate to this picture and have found some relief in the knowledge that they are not alone in their plight. My goal is to continue to share my artwork, in the hope that many others may find some solace. Further information can be found on my website [www.doodletherapy.moore.com](http://www.doodletherapy.moore.com).

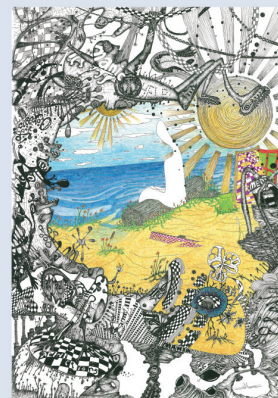

We are always looking for interesting and visually appealing images for the cover of the *Journal* and would welcome suggestions or pictures, which should be sent to Dr Allan Beveridge, British Journal of Psychiatry, 21 Prescot Street, London E1 8BB, UK or [bjp@rcpsych.ac.uk](mailto:bjp@rcpsych.ac.uk).
